# Supplementary material for: The Grain for Green Program Intensifies Trade-Offs between Ecosystem Services in Midwestern Shanxi, China
Source: MDPI journal article supplement (doi:10.3390/rs13193966), 2021-10-03
Supplement: s1 [file s1]

**Table S1.** Threats and their maximum distance of influence and weights.

| Threats           | MAX_DIST | WEIGHT | DECAY       |
|-------------------|----------|--------|-------------|
| Farmland          | 5.0      | 0.7    | linear      |
| Construction land | 8.0      | 1.0    | exponential |
| Unused land       | 3.0      | 0.2    | exponential |

MAX\_DIST: the maximum distance over which each threat affects habitat quality (measured in km).

WEIGHT: the impact of each threat on habitat quality, relative to other threats.

DECAY: the type of decay for the threat.

**Table S2.** The sensitivity of habitat types to each threat.

| NAME              | HABITAT | Farmland | Construction land | Unused land |
|-------------------|---------|----------|-------------------|-------------|
| Farmland          | 0.30    | 0.00     | 0.70              | 0.25        |
| Forest            | 1.00    | 0.50     | 0.80              | 0.80        |
| Grassland         | 0.70    | 0.40     | 0.70              | 0.50        |
| Shrubland         | 0.90    | 0.40     | 0.70              | 0.60        |
| Water body        | 0.80    | 0.60     | 0.80              | 0.50        |
| Construction land | 0.00    | 0.00     | 0.00              | 0.00        |
| Unused land       | 0.00    | 0.00     | 0.00              | 0.00        |

HABITAT: assign each habitat type a relative habitat suitability score from 0 to 1 where 1 indicates the highest habitat suitability.

**Table S3.** Table of biophysical coefficients for InVEST.

| Lucode | Land use type     | LULC_veg | Root_depth | Kc   | USLE_C | USLE_P | C_above<br>(Mg/ha) | C_below<br>(Mg/ha) | C_soil<br>(Mg/ha) | C_dead<br>(Mg/ha) |
|--------|-------------------|----------|------------|------|--------|--------|--------------------|--------------------|-------------------|-------------------|
| 1      | Farmland          | 1        | 2100       | 0.68 | 0.500  | 0.400  | 15.80              | 40.30              | 54.20             | 1.00              |
| 2      | Forest            | 1        | 7000       | 1.00 | 0.003  | 0.200  | 58.73              | 166.35             | 239.85            | 3.94              |
| 3      | Grassland         | 1        | 2600       | 0.65 | 0.010  | 0.200  | 35.30              | 86.50              | 99.90             | 1.90              |
| 4      | Shrubland         | 1        | 5000       | 0.50 | 0.010  | 0.200  | 26.60              | 67.50              | 94.00             | 6.04              |
| 5      | Water body        | 0        | 1          | 1.00 | 0.001  | 0.001  | 8.20               | 39.50              | 40.60             | 1.23              |
| 6      | Construction land | 0        | 1          | 0.30 | 0.001  | 0.001  | 0.00               | 0.00               | 95.76             | 0.00              |
| 7      | Unused land       | 0        | 1          | 0.20 | 0.250  | 0.010  | 11.30              | 32.40              | 53.80             | 0.00              |

**Table S4.** Description of variables selected in this study.

| Impact factor    | Indicator | Description                                                                                                                              | Reference                                                                                         |
|------------------|-----------|------------------------------------------------------------------------------------------------------------------------------------------|---------------------------------------------------------------------------------------------------|
| Land use         | LUD       | Dynamic degree of comprehensive land use change from 2000 to 2018.                                                                       | Refer to Li et al. [61] method for calculation.                                                   |
| Climatic         | TEM       | Average temperature from 2000 to 2018.                                                                                                   | <a href="http://www.geodata.cn/">http://www.geodata.cn/</a> (accessed on 16 March 2021)           |
|                  | PRE       | Average precipitation from 2000 to 2018.                                                                                                 | <a href="http://www.geodata.cn/">http://www.geodata.cn/</a> (accessed on 16 March 2021)           |
|                  | PET       | Average potential evapotranspiration from 2000 to 2018.                                                                                  | <a href="http://www.geodata.cn/">http://www.geodata.cn/</a> (accessed on 16 March 2021)           |
| Vegetation       | NDVI      | The Normalized Difference Vegetation Index in 2018, representing the effectiveness of afforestation, obtained from the MOD13Q1 database. | <a href="http://modis.gsfc.nasa.gov/">http://modis.gsfc.nasa.gov/</a> (accessed on 16 March 2021) |
| Geomorphological | DEM       | Elevation.                                                                                                                               | <a href="http://www.gscloud.cn">http://www.gscloud.cn</a> (accessed on 16 March 2021)             |
|                  | SLO       | Slope.                                                                                                                                   | Calculated based on DEM data.                                                                     |

|              |     |                                                                   |                                    |
|--------------|-----|-------------------------------------------------------------------|------------------------------------|
| Urbanization | CON | Changes in the percentage of construction land from 2000 to 2018. | Calculated based on Land use maps. |
|--------------|-----|-------------------------------------------------------------------|------------------------------------|

---

**Table S5.** Multicollinearity test among influencing factors.

| Influencing factors                                   | Tolerance | VIF   |
|-------------------------------------------------------|-----------|-------|
| Dynamic degree of comprehensive land use change (LUD) | 0.813     | 1.231 |
| Normalized Difference Vegetation Index (NDVI)         | 0.381     | 2.628 |
| Annual average precipitation (PRE)                    | 0.610     | 1.638 |
| Elevation (DEM)                                       | 0.280     | 3.573 |
| Percentage of construction land (CON)                 | 0.859     | 1.164 |
